# Supplementary figures and images for: Pharmacological analysis of the transmembrane action potential configuration in myoepithelial cells of the spontaneously beating heart of the ascidianStyela rustica in vitro
Source: Oxford University Press journal article supplement (doi:10.1242/jeb.154641), 2017-01-01

## Movie 1

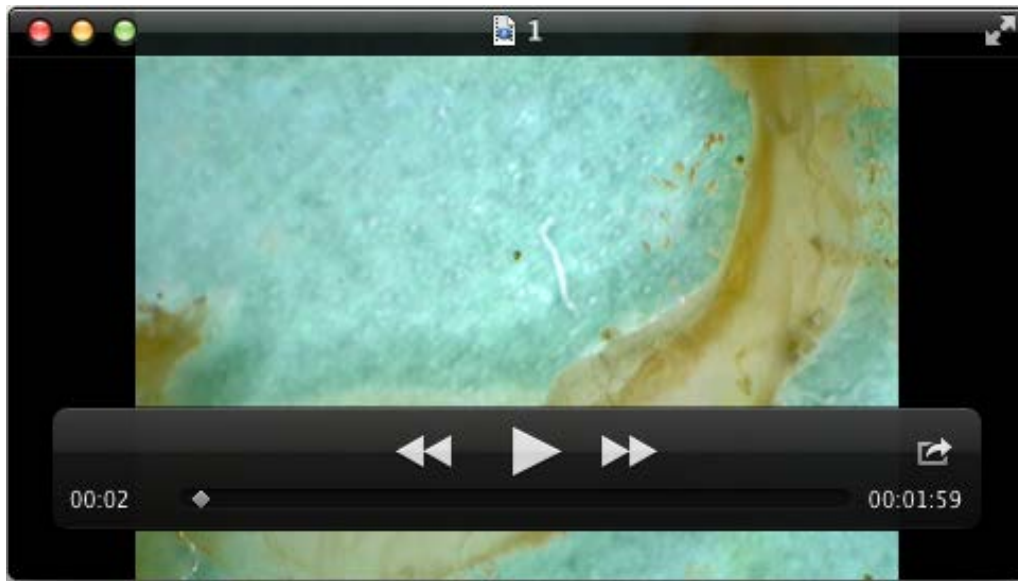

Supplement: jeb154641supp.pdf [file jeb154641supp.pdf]
